# Supplementary material for: Multicentre double-blind randomised controlled trial of systematic corticosteroid therapy in patients with acute exacerbations of chronic obstructive pulmonary disease admitted to hospital with higher eosinophil levels: the ECHO protocol
Source: HighWire-hosted journal article supplement (doi:10.1136/bmjopen-2022-066354), 2023-05-01
Supplement: bmjopen-2022-066354supp001_data_supplement.pdf [file bmjopen-2022-066354supp001_data_supplement.pdf]

**Appendix File 1.****The details of the 12 participating hospitals.**

|    | <b>Participating hospital</b>                                   | <b>Cooperative leader</b> |
|----|-----------------------------------------------------------------|---------------------------|
| 1  | Beijing Chao-Yang Hospital, Capital Medical University          | Zhaohui Tong              |
| 2  | Guang'anmen Hospital, China Academy of Chinese Medical Sciences | Guangxi Li                |
| 3  | XuanWu Hospital, Capital Medical University                     | Xiuhong Nie               |
| 4  | Beijing Anzhen Hospital, Capital Medical University             | Guangfa Zhu               |
| 5  | Beijing Tongren Hospital, Capital Medical University            | Xiaofang Liu              |
| 6  | Beijing Luhe Hospital, Capital Medical University               | Jinxiang Wang             |
| 7  | Emergency General Hospital                                      | Yunzhi Zhou               |
| 8  | Beijing Jishuitan Hospital                                      | Yu Xu                     |
| 9  | Beijing Jingmei Group General Hospital                          | Liang Chen                |
| 10 | Beijing Shijingshan Hospital                                    | Zuoqing Zhang             |
| 11 | Chinese People's Liberation Army of China General Hospital      | Yinghua Guo               |
| 12 | Beijing Yanhua Hospital                                         | Xiaoming Li               |
