# Supplementary material for: Multicentre double-blind randomised controlled trial of systematic corticosteroid therapy in patients with acute exacerbations of chronic obstructive pulmonary disease admitted to hospital with higher eosinophil levels: the ECHO protocol
Source: HighWire-hosted journal article supplement (doi:10.1136/bmjopen-2022-066354), 2023-05-01
Supplement: bmjopen-2022-066354supp002_data_supplement.pdf [file bmjopen-2022-066354supp002_data_supplement.pdf]

**Appendix File 2.****The list of the data collection**

| Items                       |                          | Variables                                                                                                                                                      |
|-----------------------------|--------------------------|----------------------------------------------------------------------------------------------------------------------------------------------------------------|
| Population information      |                          | Sex, nationality, date of birth, identification number, addresses of residence                                                                                 |
| Clinical symptoms           |                          | Cough, sputum, dyspnea, hemoptysis, runny nose, sore throat, chest pain, fatigue, night sweats, headache, muscle pain, joint pain                              |
| Vital signs                 |                          | T, HR, RR, SaO <sub>2</sub> , BP                                                                                                                               |
| Physical signs              |                          | Conjunctival oedema, cyanosis, clubbing fingers, barrel chest, rales of lungs, wheezing, hepatosplenomegaly, hepatic jugular reflux sign, edema of lower limbs |
| Laboratory examinations     | Blood routine test       | Count and percentage of Neu, Eos, LY; HGB, RDW, PLT                                                                                                            |
|                             | Blood biochemistry tests | ALB, GLB, TC, HDL-C, LDL-C, TG, AST, ALT, LDH, BUN, Cr, uric acid, Na, K                                                                                       |
|                             | Blood glucose test       | HbA1c, random blood glucose                                                                                                                                    |
|                             | Other blood tests        | Coagulation, arterial blood gas analysis, CRP, PCT                                                                                                             |
| Sputum tests                |                          | Sputum smear, sputum culture, sputum cell classification                                                                                                       |
| Pulmonary function tests    | Lung function            | FVC, FVC % predicted, FEV1, FEV1 % predicted, FEV1/FVC, DLCO, RV, TLC, RV/TLC                                                                                  |
|                             | FeNO                     |                                                                                                                                                                |
| Other physical examinations |                          | ECG, HRCT, cardiac ultrasound, lower extremity venous ultrasound                                                                                               |
| Assessment scales           |                          | EXACT, mMRC, CAT, BDI, TDI, HADS, SGRQ, CERT                                                                                                                   |

Abbreviations: temperature, T; heart rate, HR; respiratory rate, RR; oxygen saturation, SaO<sub>2</sub>; blood

pressure, BP; neutrophil, Neu; eosinophil, Eos; lymphocyte, LY; hemoglobin, HGB; red blood cell distribution width, RDW; platelet count, PLT; albumin, ALB; globulin, GLB; total cholesterol, TC; high density lipoprotein-cholesterol, HDL-C; low density lipoprotein-cholesterol, LDL-C; triglycerides, TG; aspartate aminotransferase, AST; alanine aminotransferase, ALT; lactate dehydrogenase, LDH; blood urea nitrogen, BUN; creatinine, Cr; sodium, Na; potassium, K; glycated hemoglobin, HbA1c; C-reactive protein, CRP; procalcitonin, PCT; force-velocity curve, FVC; forced expiratory volume in one second, FEV1; diffusing capacity of the lungs for carbon monoxide, DLCO; residual volume, RV; total lung capacity, TLC; fractional exhaled nitric oxide, FeNO; electrocardiogram, ECG; high resolution CT, HRCT; the Exacerbations of Chronic Pulmonary Disease Tool, EXACT; modified Medical Research Council Dyspnea Scale, mMRC; COPD Assessment Test, CAT; Baseline dyspnea index, BDI; Transition dyspnea index, TDI; Hospital Anxiety and Depression Scale, HANDS; St. George's Respiratory Questionnaire, SGRQ; COPD Exacerbation Recognition Tool, CERT.
