# Supplementary material for: Multicentre double-blind randomised controlled trial of systematic corticosteroid therapy in patients with acute exacerbations of chronic obstructive pulmonary disease admitted to hospital with higher eosinophil levels: the ECHO protocol
Source: HighWire-hosted journal article supplement (doi:10.1136/bmjopen-2022-066354), 2023-05-01
Supplement: bmjopen-2022-066354supp003_data_supplement.pdf [file bmjopen-2022-066354supp003_data_supplement.pdf]

### **Appendix File 3.**

#### **The pre-defined protocol deviations:**

- (1) Diagnosed as asthma by pulmonary function test at 90-day follow-up;
- (2) Using nebulized corticosteroid or LABA, or LAMA during the index hospitalization;
- (3) Using ICS or inhaled LABA;
- (4) Patients in the systematic corticosteroid group received corticosteroid therapy more than 5 days or less than 5 days;
- (5) Patients in the control group receive systematic corticosteroid therapy;
- (6) Incorrect initial diagnosis of COPD;
- (7) Diagnosis of pulmonary embolism and pneumonia after enrollment;
- (8) Patients explicitly asked to withdraw from the study;
- (9) Macrolides or traditional Chinese medicine used during follow-up.
